# Supplementary material for: A one-pot multicomponent facile synthesis of dihydropyrimidin-2(1H)-thione derivatives using triphenylgermane as a catalyst and its binding pattern validation
Source: Royal Society of Chemistry journal article supplement (doi:10.1039/c6ra19162b), 2016-01-01
Supplement: c6ra19162b1.pdf [file c6ra19162b1.pdf]

## A One-pot Multi-component Facile Synthesis of Dihydropyrimidin-2(1H)-thione Derivatives using Triphenylgermane as a Catalyst and its Binding Pattern Validation

Sohaila Andleeb, <sup>a</sup> Imtiaz-ud-Din, <sup>a\*</sup> Muhammad Khawar Rauf, <sup>a\*</sup> Syed Sikander Azam, <sup>c</sup> Amin Badshah, <sup>a</sup> Haseeba Sadaf, <sup>a</sup> Ahmed Raheel, <sup>a</sup> Muhammad Nawaz Tahir, <sup>b</sup> Saad Raza<sup>c</sup>

<sup>a</sup>Department of Chemistry, Quaid-i-Azam University, Islamabad-45320, Pakistan,

<sup>b</sup>Department of Physics, University of Sargodha, Sargodha, Pakistan.

<sup>c</sup>Computational Biology Lab, National Center for Bioinformatics, Quaid-i-Azam University, Islamabad-45320, Pakistan

### Supporting Information

**Supplementary Table 1.** Crystallographic data and structure refinement for compounds (1-4) and (7).

|                                                                | (1)                                                             | (2)                                               | (3)                                                               | (4)                                                | (7)                                                              |
|----------------------------------------------------------------|-----------------------------------------------------------------|---------------------------------------------------|-------------------------------------------------------------------|----------------------------------------------------|------------------------------------------------------------------|
| Formula                                                        | C <sub>14</sub> H <sub>17</sub> N <sub>3</sub> O <sub>3</sub> S | C <sub>13</sub> H <sub>15</sub> FN <sub>2</sub> S | C <sub>13</sub> H <sub>14</sub> ClN <sub>3</sub> O <sub>2</sub> S | C <sub>13</sub> H <sub>15</sub> BrN <sub>2</sub> S | C <sub>13</sub> H <sub>13</sub> Cl <sub>3</sub> N <sub>2</sub> S |
| FW                                                             | 307.36                                                          | 250.33                                            | 311.78                                                            | 311.24                                             | 335.66                                                           |
| T (K)                                                          | 296(2)                                                          | 296(2)                                            | 296(2)                                                            | 296(2)                                             | 296(2)                                                           |
| Wavelength (Å)                                                 | 0.71073                                                         | 0.71073                                           | 0.71073                                                           | 0.71073                                            | 0.71073                                                          |
| Crystal system                                                 | monoclinic                                                      | Monoclinic                                        | triclinic                                                         | monoclinic                                         | orthorhombic                                                     |
| Space group                                                    | P 21/n                                                          | P 21/n                                            | P -1                                                              | P 21/n                                             | P b c a                                                          |
| a(Å)                                                           | 12.0474(15)                                                     | 9.7432(8)                                         | 6.3088(5)                                                         | 12.3156(7)                                         | 15.2154(11)                                                      |
| b(Å)                                                           | 9.4787(9)                                                       | 7.1550(5)                                         | 10.1010(8)                                                        | 8.5081(5)                                          | 11.9065(9)                                                       |
| c(Å)                                                           | 14.3337(17)                                                     | 18.8125(14)                                       | 12.0187(10)                                                       | 14.8996(9)                                         | 17.0387(14)                                                      |
| $\alpha$ (°)                                                   | 90                                                              | 90                                                | 91.338(4)                                                         | 90                                                 | 90                                                               |
| $\beta$ (°)                                                    | 107.574(3)                                                      | 91.594(5)                                         | 98.933(3)                                                         | 114.046(3)                                         | 90                                                               |
| $\gamma$ (°)                                                   | 90                                                              | 90                                                | 99.800(4)                                                         | 90                                                 | 90                                                               |
| V(Å <sup>3</sup> ), Z                                          | 1560.4(3), 4                                                    | 1310.96(17), 4                                    | 744.59(10), 2                                                     | 1425.73(15), 4                                     | 3086.8(4), 8                                                     |
| D <sub>c</sub> (Mg/m <sup>3</sup> ), $\mu$ (mm <sup>-1</sup> ) | 1.308, 0.220                                                    | 1.268, 0.238                                      | 1.391, 0.401                                                      | 1.450, 3.010                                       | 1.445, 0.716                                                     |
| F(000)                                                         | 648                                                             | 528                                               | 324                                                               | 632                                                | 1376                                                             |
| Crystal size (mm <sup>3</sup> )                                | 0.40×0.22×0.20                                                  | 0.35×0.24×0.22                                    | 0.38×0.32×0.28                                                    | 0.36×0.24×0.22                                     | 0.38×0.30×0.26                                                   |
| $\theta$ range (°)                                             | 2.615-27.00                                                     | 2.166-27.587                                      | 1.717-27.00                                                       | 2.780 -27.513                                      | 2.391-27.00                                                      |
| Index ranges                                                   | -15 ≤ h ≤ 15<br>-12 ≤ k ≤ 8<br>-18 ≤ l ≤ 18                     | -12 ≤ h ≤ 12<br>-8 ≤ k ≤ 9<br>-24 ≤ l ≤ 24        | -8 ≤ h ≤ 7<br>-12 ≤ k ≤ 12<br>-15 ≤ l ≤ 15                        | -15 ≤ h ≤ 15<br>-10 ≤ k ≤ 11<br>-19 ≤ l ≤ 16       | -15 ≤ h ≤ 19<br>-15 ≤ k ≤ 12<br>-21 ≤ l ≤ 17                     |
| Total reflections                                              | 12620                                                           | 11164                                             | 11708                                                             | 11792                                              | 14207                                                            |
| Indept. Reflect.[R(int)]                                       | 3398 (0.0533)                                                   | 3023 (0.0295)                                     | 3177 (0.0298)                                                     | 3266 (0.0310)                                      | 3366 (0.0209)                                                    |
| Completeness to $\theta$ (25.00°)                              | 99.8%                                                           | 99.4%                                             | 97.9%                                                             | 99.6%                                              | 99.9%                                                            |

|                                               |                              |                              |                                                      |                                                      |                                                      |
|-----------------------------------------------|------------------------------|------------------------------|------------------------------------------------------|------------------------------------------------------|------------------------------------------------------|
| Max. and min.transmission                     | 0.918& 0.960                 | 0.921& 0.949                 | 0.865 & 0.898                                        | 0.410 &0.557                                         | 0.775&0.835                                          |
| Data/restraints/parameters                    | 3398/0/194                   | 3023/39/178                  | 3177/0/184                                           | 3266 /0/157                                          | 3366 /0/175                                          |
| Goodness-of-fit on F <sup>2</sup>             | 1.014                        | 1.060                        | 1.047                                                | 1.032                                                | 1.033                                                |
| Final R indices [ $I > 2\sigma(I)$ ]          | R1 = 0.0587,<br>wR2 = 0.1314 | R1 = 0.0594,<br>wR2 = 0.1647 | R <sub>1</sub> = 0.0485,<br>wR <sub>2</sub> = 0.1248 | R <sub>1</sub> = 0.0594,<br>wR <sub>2</sub> = 0.1457 | R <sub>1</sub> = 0.0284,<br>wR <sub>2</sub> = 0.0741 |
| R indices (all data)                          | R1 = 0.0587,<br>wR2 = 0.1612 | R1 = 0.0904,<br>wR2 = 0.1838 | R <sub>1</sub> = 0.0721,<br>wR <sub>2</sub> = 0.1387 | R <sub>1</sub> = 0.1158,<br>wR <sub>2</sub> = 0.1729 | R <sub>1</sub> = 0.0364,<br>wR <sub>2</sub> = 0.0809 |
| Largest peak and hole<br>(e Å <sup>-3</sup> ) | 0.217 and<br>-0.196          | 0.916 and<br>-0.382          | 0.794 and<br>-0.268                                  | 0.773 and<br>-0.809                                  | 0.22 5and<br>-0.212                                  |

**Supplementary Table 2.** Selected bond lengths (Å) and angles (°) for compounds (1-4) and (7).

| (1)       |            |                 |            | (2)        |            |                 |            |
|-----------|------------|-----------------|------------|------------|------------|-----------------|------------|
| S(1)-C(8) | 1.693(3)   | O(1)-N(1)-O(2)  | 124.2(4)   | S(1)-C(7)  | 1.681(3)   | C(7)-N(1)-C(10) | 121.3(2)   |
| O(1)-N(1) | 1.185(4)   | O(1)-N(1)-C(2)  | 119.4(3)   | F(1)-C(2)  | 1.352(3)   | C(2)-C(1)-N(1)  | 121.0(3)   |
| O(2)-N(1) | 1.216(4)   | C(8)-N(2)-C(1)  | 118.7(2)   | N(2)-C(7)  | 1.326(4)   | F(1)-C(2)-C(3)  | 119.1(3)   |
| N(3)-C(8) | 1.317(3)   | C(11)-N(2)-C(1) | 120.1(2)   | N(2)-C(8)  | 1.452(4)   | N(2)-C(7)-N(1)  | 117.2(2)   |
| N(1)-C(2) | 1.479(4)   | N(3)-C(8)-N(2)  | 117.3(2)   | C(1)-C(2)  | 1.373(4)   | N(2)-C(7)-S(1)  | 121.2(2)   |
| (3)       |            |                 |            | (4)        |            |                 |            |
| S(1)-C(7) | 1.680(3)   | O(2)-N(1)-O(1)  | 123.1(3)   | Br(1)-C(2) | 1.877(5)   | C(7)-N(1)-C(1)  | 119.2(3)   |
| O(1)-N(1) | 1.214(3)   | O(2)-N(1)-C(5)  | 117.5(3)   | S(1)-C(7)  | 1.686(4)   | C(2)-C(1)-N(1)  | 120.4(4)   |
| O(2)-N(1) | 1.208(3)   | O(1)-N(1)-C(5)  | 119.4(2)   | N(2)-C(7)  | 1.322(5)   | C(1)-C(2)-Br(1) | 120.0(4)   |
| N(3)-C(7) | 1.325(3)   | N(3)-C(7)-N(2)  | 116.6(2)   | N(2)-C(8)  | 1.462(5)   | N(2)-C(7)-N(1)  | 117.7(3)   |
| N(1)-C(5) | 1.470(4)   | N(3)-C(7)-S(1)  | 121.50(19) | C(1)-C(2)  | 1.382(6)   | N(2)-C(7)-S(1)  | 121.1(3)   |
| (7)       |            |                 |            |            |            |                 |            |
| S(1)-C(7) | 1.6886(15) | C(7)-N(1)-C(1)  | 118.01(12) | Cl(1)-C(2) | 1.7265(15) | N(1)-C(7)-S(1)  | 120.99(11) |
| N(2)-C(7) | 1.3224(19) | N(2)-C(7)-N(1)  | 116.97(13) | Cl(2)-C(4) | 1.7417(16) | N(2)-C(8)-C(9)  | 108.01(12) |
| N(2)-C(8) | 1.472(2)   | N(2)-C(7)-S(1)  | 122.04(11) | Cl(3)-C(6) | 1.7291(16) | C(5)-C(6)-Cl(3) | 119.21(12) |

**Supplementary Table 3.** The intermolecular and intramolecular hydrogen bonds for compounds **(1-4)** and **(7)**. Hydrogen-bond geometry: Distance, Å; angle, °.

| <i>D-H...A</i>                                                                                                                                                                                                                                                                                                                                                                  | <i>D-H</i> | <i>H...A</i> | <i>D...A</i> | <i>D-H...A</i> | <i>D-H...A</i>                     | <i>D-H</i> | <i>H...A</i> | <i>D...A</i> | <i>D-H...A</i> |
|---------------------------------------------------------------------------------------------------------------------------------------------------------------------------------------------------------------------------------------------------------------------------------------------------------------------------------------------------------------------------------|------------|--------------|--------------|----------------|------------------------------------|------------|--------------|--------------|----------------|
| <b>(1)</b>                                                                                                                                                                                                                                                                                                                                                                      |            |              |              |                | <b>(2)</b>                         |            |              |              |                |
| N(3)-H(3A)···S(1) <sup>i</sup>                                                                                                                                                                                                                                                                                                                                                  | 0.86       | 2.50         | 3.337(3)     | 165.0          | N(2)-H(2)···S(1) <sup>i</sup>      | 0.86       | 2.64         | 3.466(3)     | 162.0          |
| C(5)-H(5)···S(1) <sup>ii</sup>                                                                                                                                                                                                                                                                                                                                                  | 0.93       | 3.01         | 3.752(4)     | 138.4          | C(6)-H(6)···S(1) <sup>ii</sup>     | 0.93       | 2.97         | 3.860(3)     | 159.6          |
| <b>(3)</b>                                                                                                                                                                                                                                                                                                                                                                      |            |              |              |                | <b>(4)</b>                         |            |              |              |                |
| N(3)-H(3A)···S(1) <sup>i</sup>                                                                                                                                                                                                                                                                                                                                                  | 0.86       | 2.60         | 3.437(2)     | 164.8          | N(2)-H(2)···S(1) <sup>i</sup>      | 0.86       | 2.53         | 3.371(3)     | 164.4          |
| C(11)-H(11C)···O(1) <sup>ii</sup>                                                                                                                                                                                                                                                                                                                                               | 0.96       | 2.39         | 3.345(5)     | 172.5          | C(6)-H(6)···S(1) <sup>ii</sup>     | 0.93       | 3.00         | 3.753(6)     | 139.7          |
| <b>(7)</b>                                                                                                                                                                                                                                                                                                                                                                      |            |              |              |                | C(9)-H(9)···S(1) <sup>iii</sup>    |            |              |              |                |
| N(2)-H(2)···S(1) <sup>i</sup>                                                                                                                                                                                                                                                                                                                                                   | 0.86       | 2.59         | 3.4219(14)   | 162.2          | C(11)-H(11C)···Br(1) <sup>iv</sup> | 0.96       | 3.02         | 3.663(5)     | 125.4          |
| C(5)-H(5)···S(1) <sup>ii</sup>                                                                                                                                                                                                                                                                                                                                                  | 0.93       | 2.87         | 3.8017(17)   | 176.3          |                                    |            |              |              |                |
| C(11)-H(11C)···Cl(3)                                                                                                                                                                                                                                                                                                                                                            | 0.96       | 2.98         | 3.658(2)     | 128.9          |                                    |            |              |              |                |
| Symmetry codes: (i) $-x+1, -y+2, -z+1$ ; (ii) $-x+1, -y+1, -z+1$ <b>(1)</b> ; (i) $-x, -y, -z+1$ ; (ii) $-x, -y+1, -z+1$ <b>(2)</b> ; (i) $-x+1, -y, -z$ ; (ii) $x-1, y, z$ <b>(3)</b> ; (i) $-x, -y+1, -z+1$ ; (ii) $-x, -y, -z+1$ ; (iii) $x-1/2, -y+1/2, z-1/2$ ; (iv) $-x+1/2, y-1/2, -z+1/2$ . <b>(4)</b> ; (i) $-x+1, -y+1, -z+1$ ; (ii) $-x+1, y-1/2, -z+1/2$ <b>(7)</b> |            |              |              |                |                                    |            |              |              |                |

NMR ( $^1\text{H}$  and  $^{13}\text{C}$ ) spectra for representative compounds*1-(4-methoxy-2-nitrophenyl)-4,4,6-trimethyl-3,4-dihydropyrimidine-2(1H)-thione (1)*

DR.IMTIAZ-UD-DIN/SOHAJLA/TH4\_13CNMR\_CDCL3

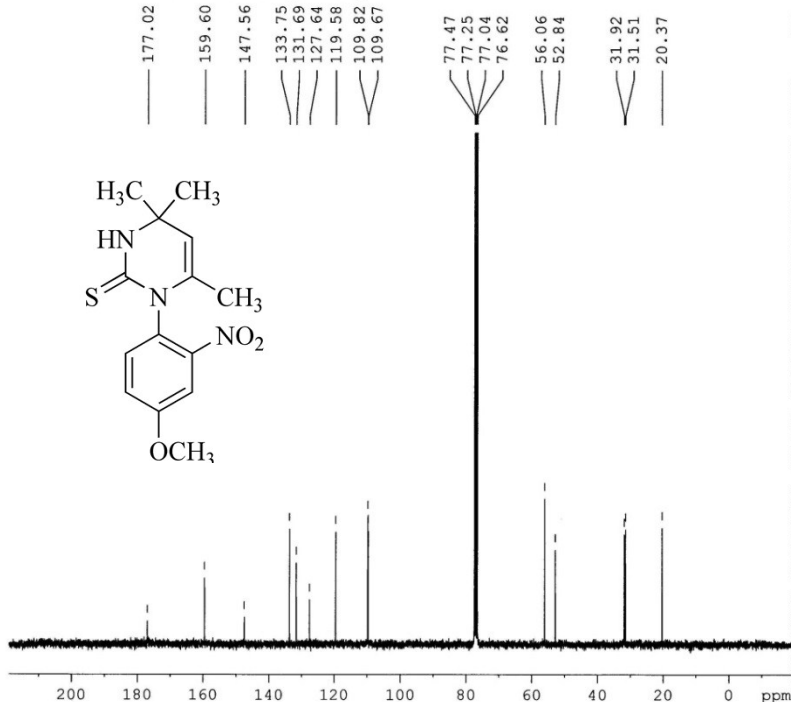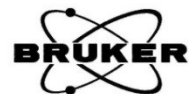

Current Data Parameters  
 NAME TH4\_13CNMR\_CDCL3  
 EXPNO 1  
 PROCNO 1

F2 - Acquisition Parameters  
 Date\_ 20140701  
 Time 12.15  
 INSTRUM spect  
 PROBHD 5 mm DUL 13C-1  
 PULPROG zgpg30  
 TD 35968  
 SOLVENT CDCL3  
 NS 1024  
 DS 0  
 SWH 17985.611 Hz  
 FIDRES 0.500045 Hz  
 AQ 0.9999604 sec  
 RG 1448.2  
 DW 27.800 usec  
 DE 6.00 usec  
 TE 296.9 K  
 D1 2.0000000 sec  
 d11 0.0300000 sec  
 DELTA 1.89999998 sec  
 TDO 1

===== CHANNEL f1 =====  
 NUC1 13C  
 P1 7.00 usec  
 PL1 -3.00 dB  
 SFO1 75.4752953 MHz

===== CHANNEL f2 =====  
 CPDPRG2 waltz16  
 NUC2 1H  
 PCPD2 80.00 usec  
 PL2 0.00 dB  
 PL12 18.00 dB  
 PL13 21.00 dB  
 SFO2 300.1312005 MHz

F2 - Processing parameters  
 SI 32768  
 SF 75.4677490 MHz  
 WDW EM  
 SSB 0  
 LB 1.00 Hz  
 GB 0  
 PC 1.40

DR.IMTIAZ-UD-DIN/SOHAJLA/TH4\_1HNMR\_CDCL3

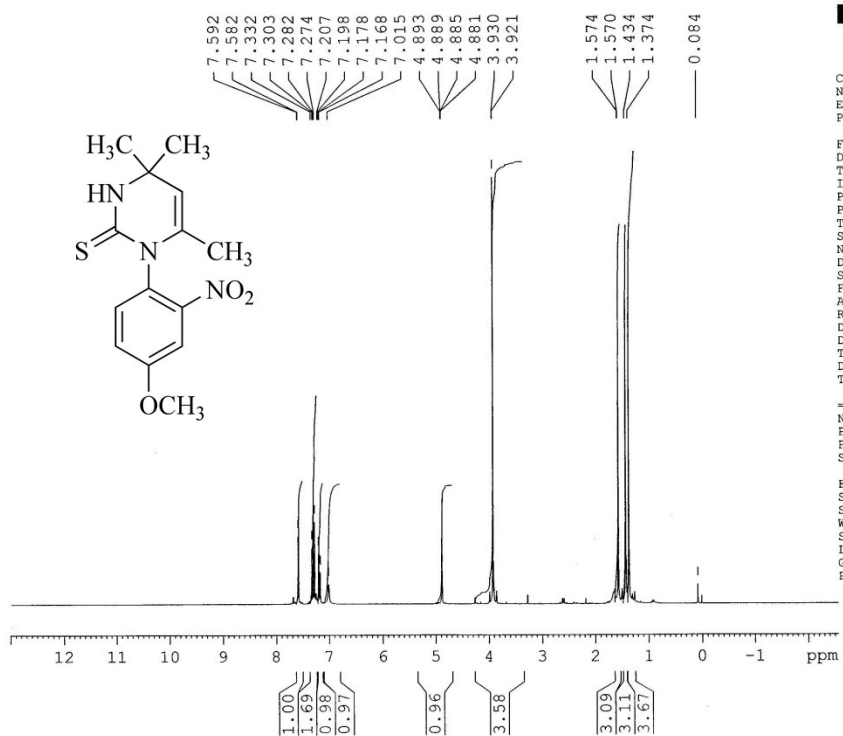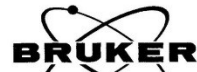

Current Data Parameters  
 NAME TH4\_1HNMR\_CDCL3  
 EXPNO 1  
 PROCNO 1

F2 - Acquisition Parameters  
 Date\_ 20140701  
 Time 12.19  
 INSTRUM spect  
 PROBHD 5 mm DUL 13C-1  
 PULPROG zg30  
 TD 65536  
 SOLVENT CDCL3  
 NS 8  
 DS 0  
 SWH 6172.839 Hz  
 FIDRES 0.094190 Hz  
 AQ 5.3084660 sec  
 RG 228.1  
 DW 81.000 usec  
 DE 6.00 usec  
 TE 296.5 K  
 D1 1.0000000 sec  
 TDO 1

===== CHANNEL f1 =====  
 NUC1 1H  
 P1 11.30 usec  
 PL1 2.00 dB  
 SFO1 300.1318534 MHz

F2 - Processing parameters  
 SI 32768  
 SF 300.1300000 MHz  
 WDW EM  
 SSB 0  
 LB 0.30 Hz  
 GB 0  
 PC 1.00

1-(2-Fluorophenyl)-4,4,6-trimethyl-3,4-dihydropyrimidine-2(1H)-thione(2)

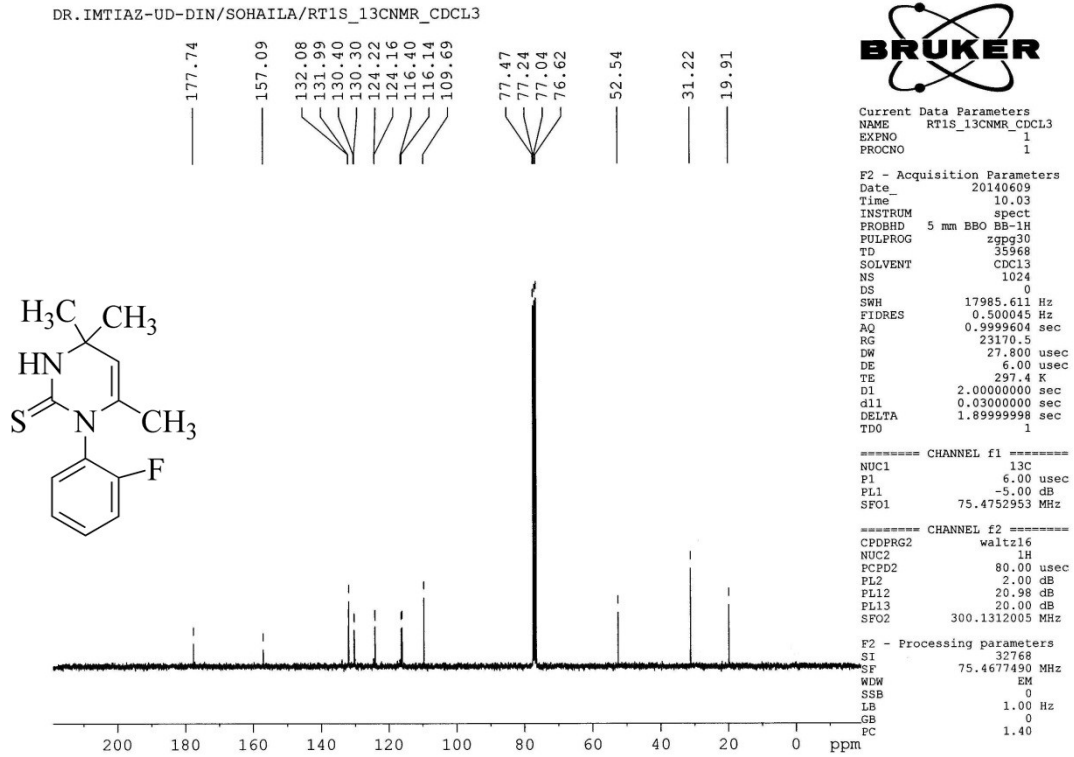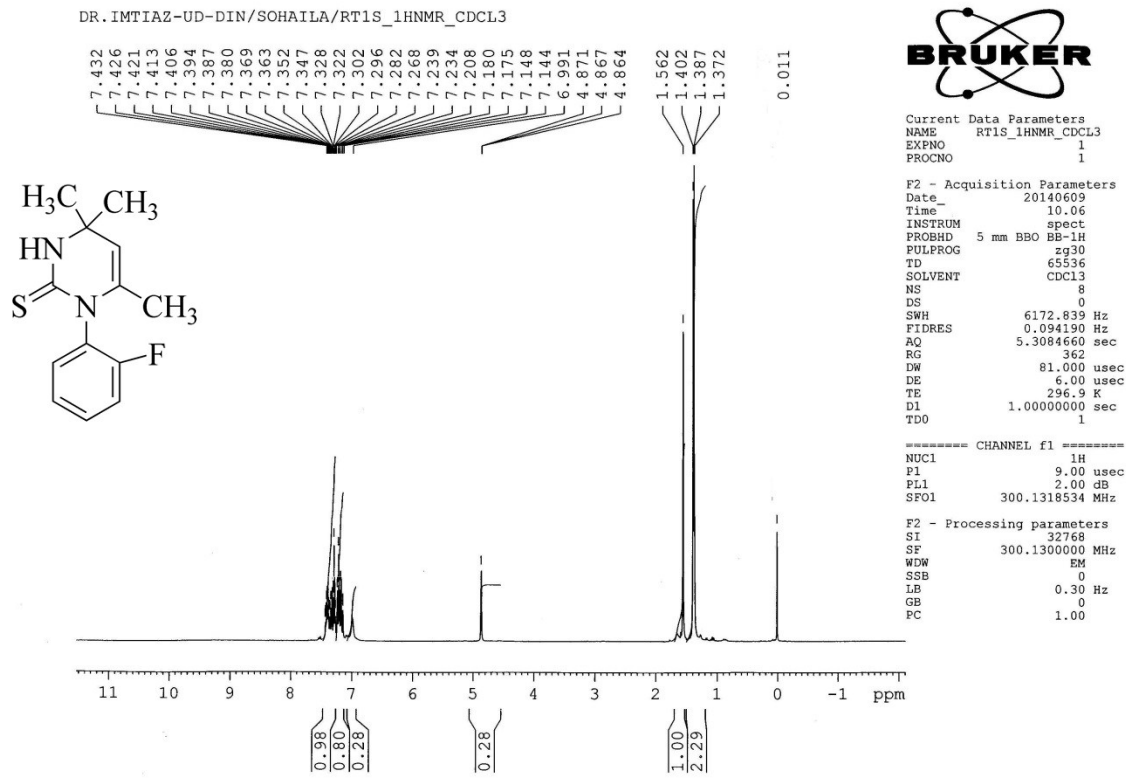

*1-(2-Chloro-5-nitrophenyl)-4,4,6-trimethyl-3,4-dihydropyrimidine-2(1H)-thione(3)*

DR. IMTIAZ-UD-DIN/SOHAILA/TH1\_13CNMR\_CDCL3

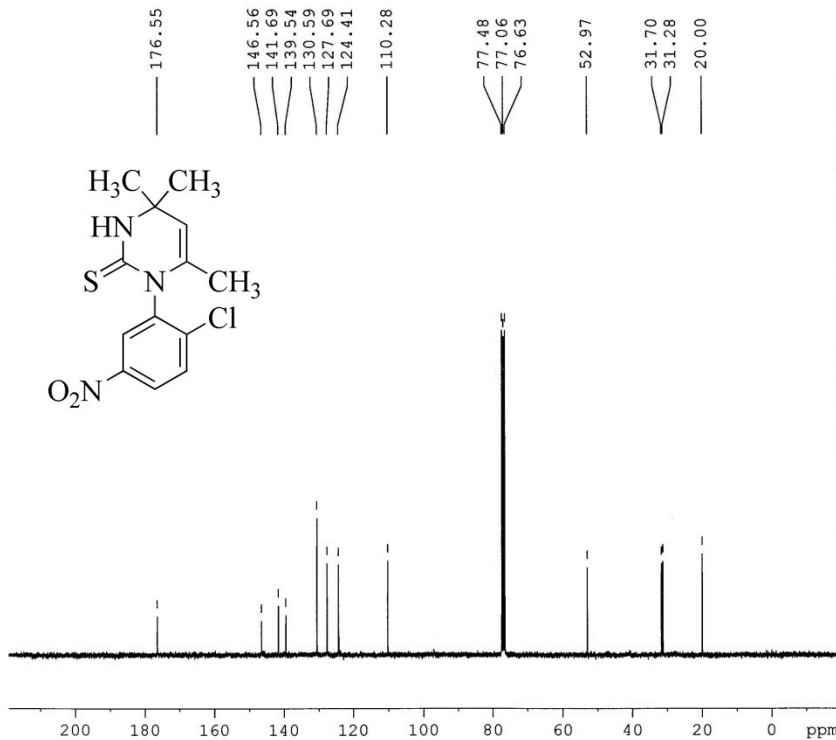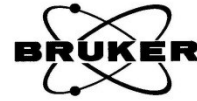

Current Data Parameters  
 NAME TH1\_13CNMR\_CDCL3  
 EXPNO 1  
 PROCNO 1

F2 - Acquisition Parameters  
 Date\_ 20140609  
 Time\_ 11.02  
 INSTRUM spect  
 PROBHD 5 mm BBO BB-1H  
 PULPROG zgpg30  
 TD 35968  
 SOLVENT CDCL3  
 NS 1024  
 DS 0  
 SWH 17985.611 Hz  
 FIDRES 0.500045 Hz  
 AQ 0.9999604 sec  
 RG 29193  
 DW 27.800 usec  
 DE 6.00 usec  
 TE 297.1 K  
 D1 2.0000000 sec  
 d11 0.0300000 sec  
 DELTA 1.89999998 sec  
 TDO 1

----- CHANNEL f1 -----  
 NUC1 13C  
 P1 6.00 usec  
 PL1 -5.00 dB  
 SFO1 75.4752953 MHz

----- CHANNEL f2 -----  
 CPDPRG2 waltz16  
 NUC2 1H  
 PCPD2 80.00 usec  
 PL2 2.00 dB  
 PL12 20.98 dB  
 PL13 20.00 dB  
 SFO2 300.1312005 MHz

F2 - Processing parameters  
 SI 32768  
 SF 75.4677490 MHz  
 WDW EM  
 SSB 0  
 LB 1.00 Hz  
 GB 0  
 PC 1.40

DR. IMTIAZ-UD-DIN/SOHAILA/TH1\_1HNMR\_CDCL3

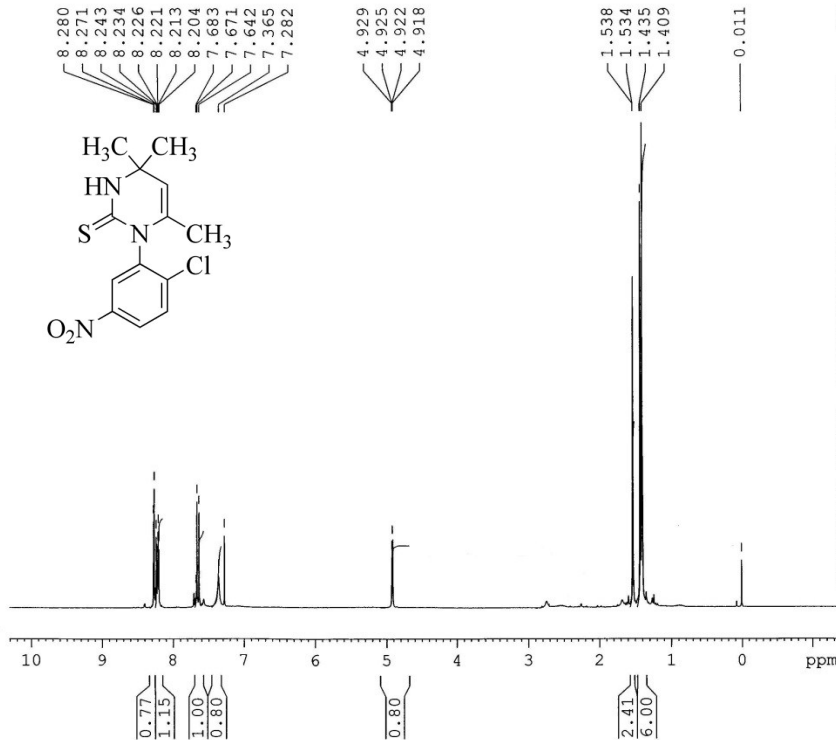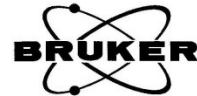

Current Data Parameters  
 NAME TH1\_1HNMR\_CDCL3  
 EXPNO 1  
 PROCNO 1

F2 - Acquisition Parameters  
 Date\_ 20140609  
 Time\_ 11.38  
 INSTRUM spect  
 PROBHD 5 mm BBO BB-1H  
 PULPROG zg30  
 TD 65536  
 SOLVENT CDCL3  
 NS 4  
 DS 0  
 SWH 6172.839 Hz  
 FIDRES 0.094190 Hz  
 AQ 5.3084660 sec  
 RG 287.4  
 DW 81.000 usec  
 DE 6.00 usec  
 TE 296.6 K  
 D1 1.0000000 sec  
 TDO 1

----- CHANNEL f1 -----  
 NUC1 1H  
 P1 9.00 usec  
 PL1 2.00 dB  
 SFO1 300.1318534 MHz

F2 - Processing parameters  
 SI 32768  
 SF 300.1300000 MHz  
 WDW EM  
 SSB 0  
 LB 0.30 Hz  
 GB 0  
 PC 1.00

*1-(2-Bromophenyl)-4,4,6-trimethyl-3,4-dihydropyrimidine-2(1H)-thione(4)*

DR. IMTIAZ-UD-DIN/SOHAILA/RT4\_13CNMR\_CDCL3

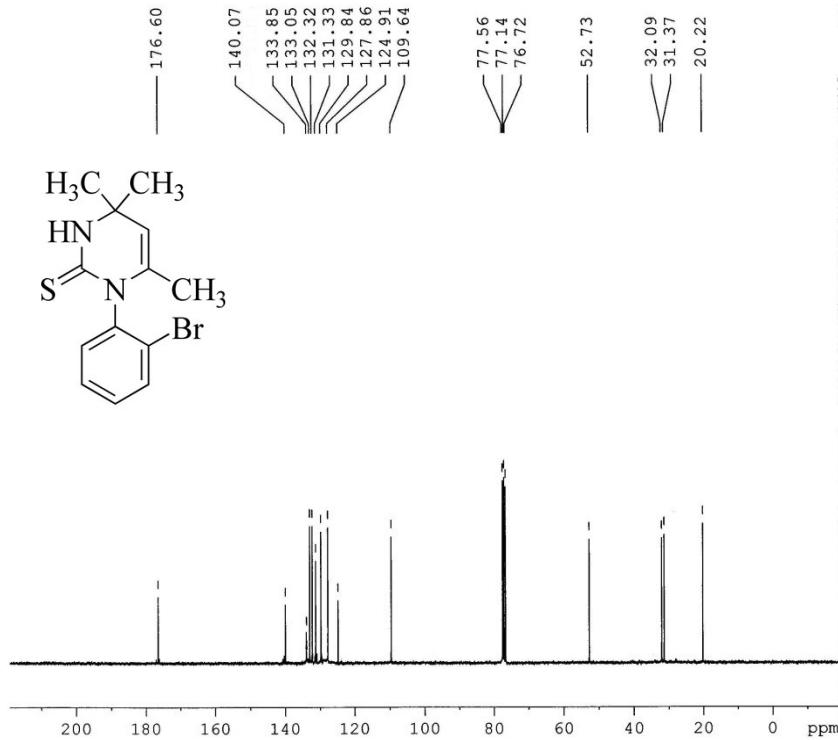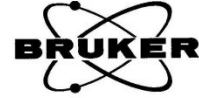

Current Data Parameters  
 NAME RT4\_13CNMR\_CDCL3  
 EXPNO 1  
 PROCNO 1

F2 - Acquisition Parameters  
 Date\_ 20140617  
 Time 18.43  
 INSTRUM spect  
 PROBHD 5 mm BBO BB-1H  
 PULPROG zgpg30  
 TD 35968  
 SOLVENT CDCL3  
 NS 1024  
 DS 0  
 SWH 17985.611 Hz  
 FIDRES 0.500045 Hz  
 AQ 0.9999604 sec  
 RG 7298.2  
 DW 27.800 usec  
 DE 6.00 usec  
 TE 298.2 K  
 D1 2.00000000 sec  
 d11 0.03000000 sec  
 DELTA 1.89999998 sec  
 TDO 1

----- CHANNEL f1 -----  
 NUC1 13C  
 P1 6.00 usec  
 PL1 -5.00 dB  
 SFO1 75.4752953 MHz

----- CHANNEL f2 -----  
 CPDPRG2 waltz16  
 NUC2 1H  
 PCPD2 80.00 usec  
 PL2 2.00 dB  
 PL12 20.98 dB  
 PL13 20.00 dB  
 SFO2 300.1312005 MHz

F2 - Processing parameters  
 SI 32768  
 SF 75.4677490 MHz  
 WDW EM  
 SSB 0  
 LB 1.00 Hz  
 GB 0  
 PC 1.40

DR. IMTIAZ-UD-DIN/SOHAILA/RT4\_1HNMR\_CDCL3

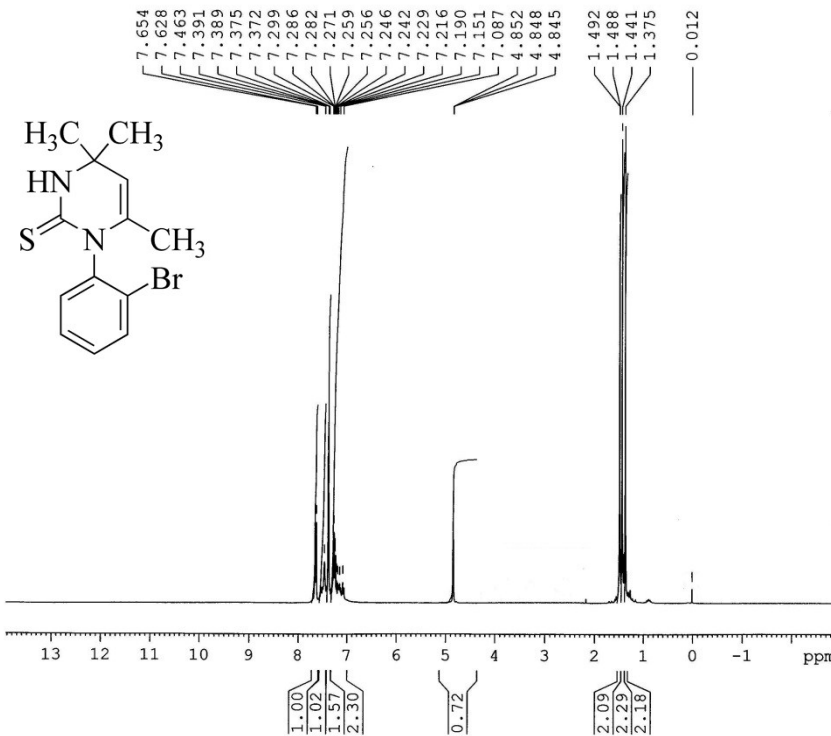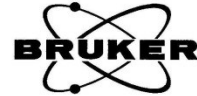

Current Data Parameters  
 NAME RT4\_1HNMR\_CDCL3  
 EXPNO 1  
 PROCNO 1

F2 - Acquisition Parameters  
 Date\_ 20140617  
 Time 18.45  
 INSTRUM spect  
 PROBHD 5 mm BBO BB-1H  
 PULPROG zg30  
 TD 65536  
 SOLVENT CDCL3  
 NS 4  
 DS 0  
 SWH 6172.839 Hz  
 FIDRES 0.094190 Hz  
 AQ 5.3084660 sec  
 RG 101.6  
 DW 81.000 usec  
 DE 6.00 usec  
 TE 297.9 K  
 D1 1.00000000 sec  
 TDO 1

----- CHANNEL f1 -----  
 NUC1 1H  
 P1 9.00 usec  
 PL1 2.00 dB  
 SFO1 300.1318534 MHz

F2 - Processing parameters  
 SI 32768  
 SF 300.1300000 MHz  
 WDW EM  
 SSB 0  
 LB 0.30 Hz  
 GB 0  
 PC 1.00

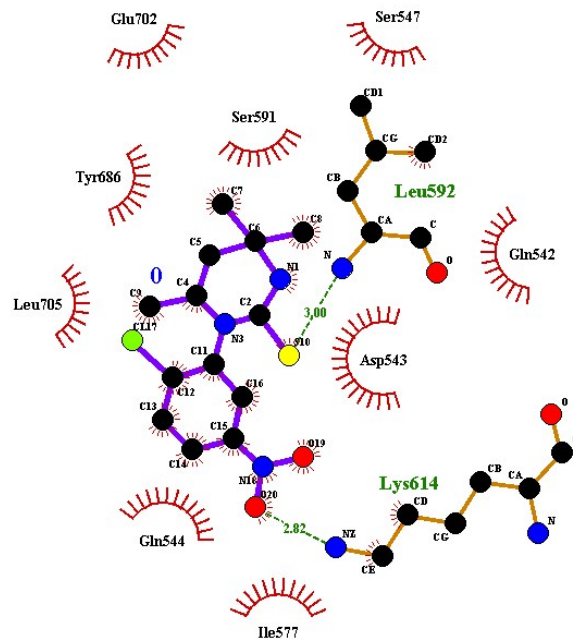

**Supplementary Fig. 1.** Interaction diagram of **3** with Human topoisomerase II alpha (4fm9) using LigPlot

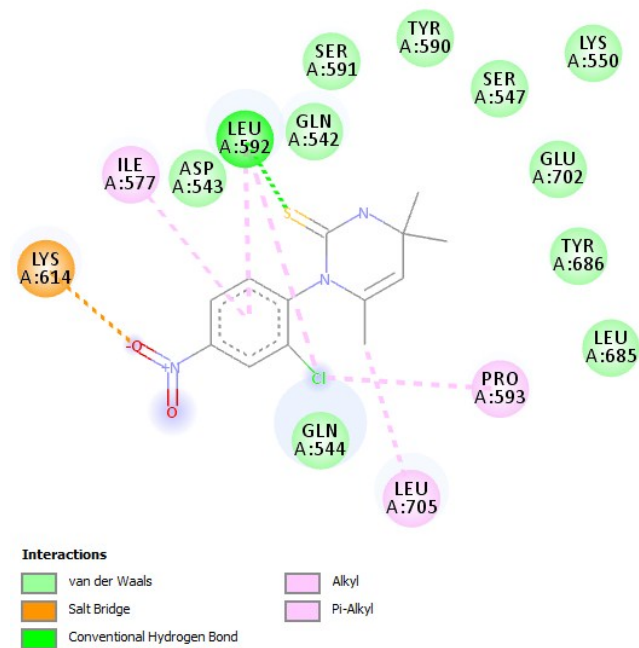

**Supplementary Fig. 2.** Interaction diagram of **8** with Human topoisomerase II alpha (4fm9) using Discovery Studio



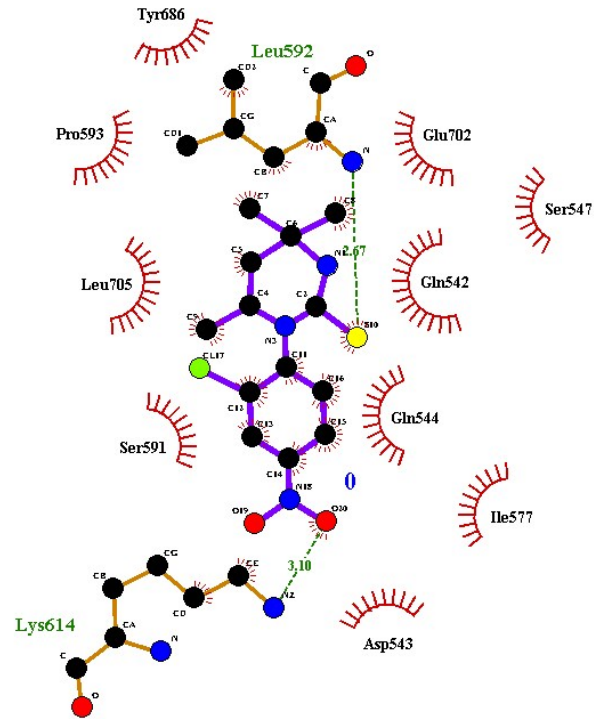

**Supplementary Fig. 3.** Interaction diagram of **8** with Human topoisomerase II alpha (4fm9) using LigPlot

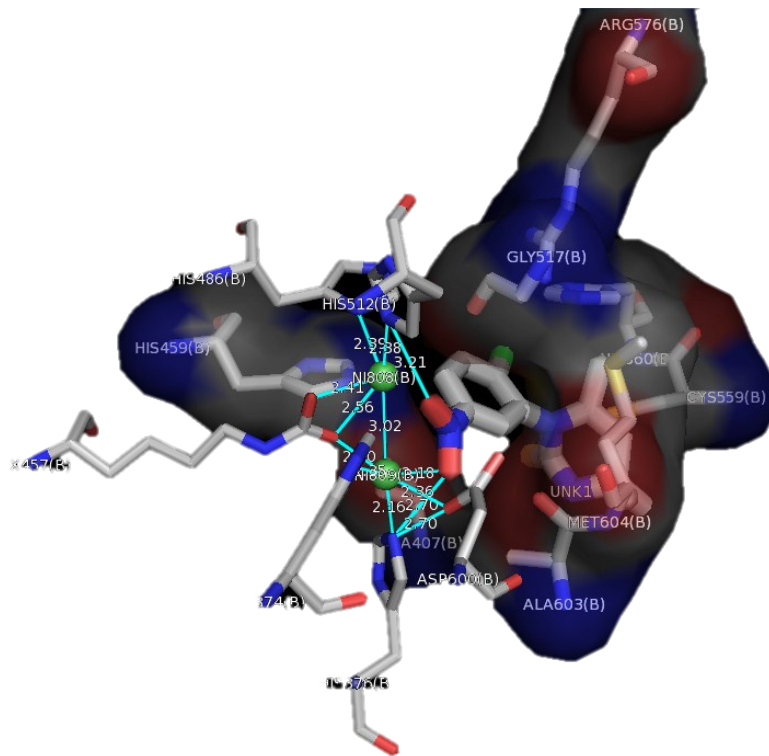

**Supplementary Fig. 4.** Interaction diagram of **3** with *Helicobacter pylori* Urease (1e9y) using PyMol.

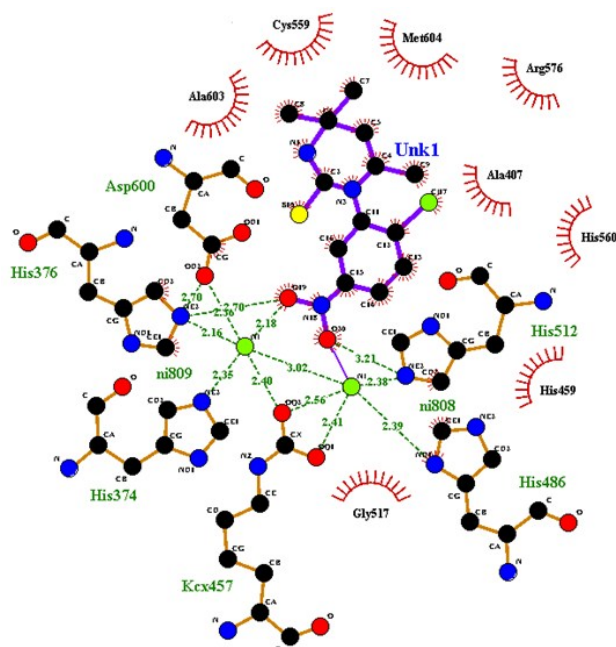

**Supplementary Fig. 5.** Interaction diagram of **3** with *Helicobacter pylori* Urease (1e9y) using LigPlot.

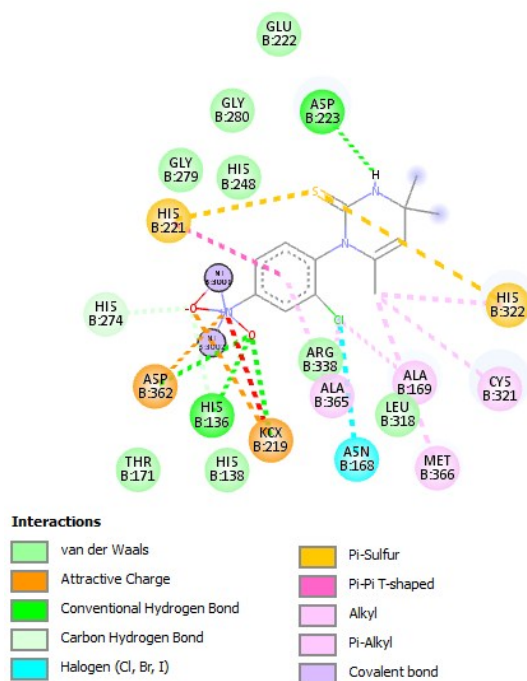

**Supplementary Fig. 6.** Interaction diagram of **8** with *Helicobacter pylori* Urease (1e9y) using Discovery Studio.
